# Supplementary material for: Association between socioeconomic status and primary healthcare utilisation in Portugal
Source: Research Square preprint supplement (doi:10.21203/rs.3.rs-5702367/v1), 2024-12-27
Supplement: Supplementary file 1 [file e38f527808aa5df0163ba1e7.docx]

# Supplementary material

## Two-Part Model (TPM) Econometric Representation

### TPM Part 1: Logistic Regression for Service Utilisation Probability

The first component models the probability of any PHC service utilisation, where the dependent variable is binary, taking the value 1 if individual i used PHC services and 0 otherwise. The logistic regression is specified as:

where represents the vector of covariates for individual i (including sex, age, nationality, household income, education level, employment status, household type and health insurance and/or subsystems), and is the vector of estimated coefficients.

### TPM Part 2: Gamma Regression for Conditional Utilisation Intensity

For individuals who utilized PHC services ( > 0), the second component models the extent of utilisation using a Gamma regression with a log link function, specified as:

where is the expected number of consultations for individuals who used the PHC services, and is the vector of coefficients in the Gamma regression.

### Overall TPM representation:

The overall expected value of , combining both parts of the TPM, is given by:

### Overall Average Marginal Effect (AME):

The overall AME combines the marginal effects from both parts, and should be expressed as:

The first term reflects the effect of changes in the probability of using PHC services on the expected number of consultations, while the second term represents the effect of changes in the intensity of utilization, weighted by the probability of service use.

Supplementary table 1 Model Fit Statistics (AIC and BIC)

| **Model** | **AIC** | **BIC** |
| --- | --- | --- |
| TPM | 20,569.02 | 20,583.47 |
| Hurdle Poisson | 20,289.34 | 20,650.43 |
| Hurdle NB | 19,551.41 | 19,919.72 |
| ZIP Poisson | 20,277.64 | 20,638.73 |
| ZIP NB | 19,994.46 | 20,362.77 |

Supplementary table 2 Excluded sample characteristics

|  |  | Relative Frequency (%) | |
| --- | --- | --- | --- |
| Variable | Category | Excluded sample | Selected sample |
| Sex | Male | 53.24 | 40.00 |
| Female | 46.76 | 60.00 |
| Age group | 15-29 years | 17.17 | 8.11 |
| 30-44 years | 26.03 | 14.99 |
| 45-59 years | 29.62 | 23.96 |
| 60-74 years | 18.46 | 31.68 |
| 75 and older | 8.72 | 21.27 |
| Education level | Early education | 6.07 | 11.78 |
| Primary and lower secondary education | 50.62 | 57.63 |
| Upper secondary and post-secondary education | 22.97 | 15.56 |
| Tertiary education | 20.35 | 15.03 |
| Nationality | Portugal | 96.14 | 98.16 |
| Foreign | 3.86 | 1.84 |
| Income level | 1st quintile | 21.85 | 18.34 |
| 2nd quintile | 18.02 | 26.51 |
| 3rd quintile | 18.11 | 21.33 |
| 4th quintile | 20.11 | 17.05 |
| 5th quintile | 21.91 | 16.77 |
| Employment status | Employed | 57.95 | 39.83 |
| Unemployed | 8.89 | 6.24 |
| Retired | 19.32 | 40.76 |
| Disabled/Inactive | 6.51 | 9.44 |
| Student | 7.33 | 3.73 |
| Health insurance and/or subsystems | Has health subsystem and health insurance | 4.15 | 3.46 |
| No health subsystem or health insurance | 60.75 | 64.33 |
| Only health insurance | 20.2 | 16.22 |
| Only health subsystem | 14.9 | 15.99 |
| Household type | One person household | 24.44 | 28.07 |
| One parent family household | 10.04 | 8.21 |
| Couple family household without children | 20.38 | 31.90 |
| Couple family household with children | 36.69 | 25.30 |
| Other household | 8.45 | 6.52 |

Supplementary table 3 Multivariate analysis results

|  |  | Logit Model | | | | Gamma Model | | | |
| --- | --- | --- | --- | --- | --- | --- | --- | --- | --- |
|  | Variable | Estimate | Std_Error | Z_Value | OR [CI 95%] | Estimate | Std_Error | Z_Value | RR [CI 95%] |
| (Intercept) | (Intercept) | -0.36 | 0.19 | -1.87 | 0.70 [0.48, 1.02] | 0.22* | 0.10 | 2.12 | 1.25 [1.02, 1.53] |
| Sex | Male [REF] |  |  |  |  |  |  |  |  |
| Female | 0.11* | 0.05 | 2.47 | 1.12 [1.02, 1.22] | -0.01 | 0.02 | -0.32 | 0.99 [0.95, 1.04] |
| Age group | 15-29 years [REF] |  |  |  |  |  |  |  |  |
| 30-44 years | -0.10 | 0.11 | -0.87 | 0.91 [0.73, 1.13] | 0.05 | 0.06 | 0.80 | 1.05 [0.93, 1.18] |
| 45-59 years | 0.11 | 0.11 | 1.01 | 1.12 [0.90, 1.38] | 0.02 | 0.06 | 0.40 | 1.02 [0.91, 1.15] |
| 60-74 years | 0.13 | 0.12 | 1.07 | 1.14 [0.90, 1.45] | 0.01 | 0.07 | 0.16 | 1.01 [0.89, 1.15] |
| 75 and older | 0.19 | 0.13 | 1.43 | 1.21 [0.93, 1.58] | 0.03 | 0.07 | 0.37 | 1.03 [0.89, 1.18] |
| Nationality | Portugal [REF] |  |  |  |  |  |  |  |  |
| Foreign | 0.04 | 0.15 | 0.28 | 1.04 [0.77, 1.42] | -0.10 | 0.08 | -1.15 | 0.91 [0.77, 1.07] |
| Income level | 1st quintile [REF] |  |  |  |  |  |  |  |  |
| 2nd quintile | -0.12 | 0.08 | -1.53 | 0.89 [0.77, 1.03] | 0.01 | 0.04 | 0.31 | 1.01 [0.94, 1.09] |
| 3rd quintile | -0.05 | 0.08 | -0.65 | 0.95 [0.81, 1.11] | 0.05 | 0.04 | 1.21 | 1.05 [0.97, 1.14] |
| 4th quintile | -0.11 | 0.08 | -1.27 | 0.90 [0.77, 1.06] | 0.02 | 0.04 | 0.47 | 1.02 [0.94, 1.11] |
| 5th quintile | -0.19 | 0.10 | -1.96 | 0.83 [0.68, 1.00] | 0.04 | 0.05 | 0.68 | 1.04 [0.94, 1.15] |
| Education level | ISCED 0 [REF] |  |  |  |  |  |  |  |  |
| ISCED 1 and 2 | -0.09 | 0.07 | -1.32 | 0.91 [0.79, 1.05] | -0.06 | 0.03 | -1.87 | 0.94 [0.88, 1.00] |
| ISCED 3 and 4 | -0.16 | 0.10 | -1.71 | 0.85 [0.70, 1.02] | -0.10* | 0.05 | -2.07 | 0.9 [0.82, 0.99] |
| ISCED 5 to 8 | -0.07 | 0.11 | -0.61 | 0.94 [0.76, 1.16] | -0.09 | 0.06 | -1.60 | 0.91 [0.82, 1.02] |
| Employment status | Employed [REF] |  |  |  |  |  |  |  |  |
| Unemployed | 0.09 | 0.09 | 0.97 | 1.09 [0.91, 1.31] | 0.11* | 0.05 | 2.26 | 1.12 [1.01, 1.23] |
| Retired | 0.18* | 0.08 | 2.29 | 1.19 [1.03, 1.38] | 0.03 | 0.04 | 0.82 | 1.03 [0.96, 1.12] |
| Disabled/Inactive | 0.30** | 0.09 | 3.26 | 1.35 [1.13, 1.62] | 0.16** | 0.05 | 3.28 | 1.17 [1.06, 1.28] |
| Student | -0.54*** | 0.16 | -3.47 | 0.58 [0.43, 0.79] | -0.08 | 0.09 | -0.84 | 0.93 [0.78, 1.1] |
| Household type | One-person household [REF] |  |  |  |  |  |  |  |  |
| One parent family household | -0.16 | 0.09 | -1.90 | 0.85 [0.72, 1.01] | 0.02 | 0.05 | 0.35 | 1.02 [0.93, 1.11] |
| Couple family household without children | -0.02 | 0.06 | -0.41 | 0.98 [0.88, 1.09] | -0.05 | 0.03 | -1.59 | 0.96 [0.9, 1.01] |
| Couple family household with children | -0.13* | 0.06 | -2.01 | 0.88 [0.78, 1.00] | -0.07* | 0.03 | -2.18 | 0.93 [0.87, 0.99] |
| Other household | -0.13 | 0.09 | -1.45 | 0.88 [0.73, 1.05] | -0.10* | 0.05 | -2.02 | 0.91 [0.83, 1] |
| Health insurance and/or subsystems | Has health subsystem and health insurance [REF] |  |  |  |  |  |  |  |  |
| No health subsystem or health insurance | 0.04 | 0.12 | 0.32 | 1.04 [0.82, 1.31] | 0.09 | 0.07 | 1.41 | 1.10 [0.97, 1.25] |
| Only health insurance | -0.06 | 0.12 | -0.48 | 0.94 [0.74, 1.2] | 0.06 | 0.07 | 0.92 | 1.06 [0.93, 1.22] |
| Only health subsystem | -0.04 | 0.12 | -0.33 | 0.96 [0.75, 1.22] | 0.06 | 0.07 | 0.89 | 1.06 [0.93, 1.21] |

Supplementary table 4 Disparities among education levels in terms of unmet needs due to excessive waiting times, distance or transport problems and financial difficulties

|  | Relative Frequency (%) Yes | | |
| --- | --- | --- | --- |
| Education level | Excessive waiting times | Distance or transport problems | Financial difficulties |
| Early education | 31.23 | 9.60 | 15.07 |
| Primary and lower secondary education | 28.79 | 5.82 | 11.78 |
| Upper secondary and post-secondary education | 26.15 | 2.37 | 7.95 |
| Tertiary education | 23.02 | 2.99 | 5.59 |
| Pearson's Chi-squared test | X-squared = 150.64 | X-squared = 186.44 | X-squared = 261.04 |
|  | p-value < 2.2e-16 | p-value < 2.2e-16 | p-value < 2.2e-16 |

Supplementary table 5 Average marginal effects for the two-part model (subsample of individuals reporting unmet needs)

| Variable | Category | Two-Part Model (Full Model) |
| --- | --- | --- |
| Sex | Male [REF] |  |
| Female | 0.00 *** (0.00) |
| Age group | 15-29 years |  |
| 30-44 years | 0.00 *** (0.00) |
| 45-59 years | 0.00 *** (0.00) |
| 60-74 years | 0.00 ** (0.00) |
| 75 and older | 0.00 *** (0.00) |
| Nationality | Portugal [REF] |  |
| Foreign | 0.00 (0.00) |
| Income level | 1st quintile |  |
| 2nd quintile | 0* (0.00) |
| 3rd quintile | 0** (0.00) |
| 4th quintile | 0* (0.00) |
| 5th quintile | 0*** (0.00) |
| Education level | Early education [REF] |  |
| Primary and lower secondary education | -0.15*** (0.00) |
| Upper secondary and post-secondary education | -0.3*** (0.00) |
| Tertiary education | -0.26***(0.00) |
| Employment status | Employed [REF] |  |
| Unemployed | 0.00 (0.00) |
| Retired | 0.00 (0.00) |
| Disabled/Inactive | 0.00 (0.00) |
| Student | 0.00 (0.00) |
| Household type | One-person household [REF] |  |
| One parent family household | 0.00 (0.00) |
| Couple family household without children | 0.00 (0.00) |
| Couple family household with children | 0.00 (0.00) |
| Other household | 0.00 (0.00) |
| Health insurance and/or subsystems | Has health subsystem and health insurance [REF] |  |
| No health subsystem or health insurance | 0.00 (0.00) |
| Only health insurance | 0.00 (0.00) |
| Only health subsystem | 0.00 (0.00) |

*Note: AME (Standard Error); Significance levels are indicated by * for p < 0.05, ** for p < 0.01 and *** for p < 0.001*
